# Supplementary material
Source: Springer Nature journal article supplement (https://www.springermedizin.de/resource/supplementary/12955_2012_962_MOESM2_ESM.pdf/9558848)
Supplement: MOESM2 [file 9558848]

## Study design of the feasibility study

Marburg  
(80.000 inhabitants)

Gießen  
(75.000 inhabitants)

Shared development of  
the CHD pathway

GPs and  
cardiologists

Qualitative Evaluation

Study arm A:  
Developer

6 GPs

Study arm B:  
User

6 GPs

Study arm C:  
Control

6 GPs

Consecutive recruitment of CHD patients in each study arm

Quantitative Evaluation
